# Supplementary material for: Electronic and thermoelectric properties of semiconducting Bi2SSe2 and Bi2S2Se monolayers with high optical absorption
Source: Royal Society of Chemistry journal article supplement (doi:10.1039/d2cp03708d), 2022-01-01
Supplement: d2cp03708d2.pdf [file d2cp03708d2.pdf]

**Supplemental Material for**

**Electronic and thermoelectric properties of semiconducting**

**Bi<sub>2</sub>SSe<sub>2</sub> and Bi<sub>2</sub>S<sub>2</sub>Se monolayers with high optical**

**absorption**

Shu-Hao Cao<sup>1</sup>, Tian Zhang<sup>2</sup>, Cui-E Hu<sup>3,\*</sup>, Xiang-Rong Chen<sup>1,\*</sup>, Hua-Yun Geng<sup>4</sup>

<sup>1</sup> Institute of Atomic and Molecular Physics, Sichuan University, Chengdu 610065,  
China;

<sup>2</sup> College of Physics and Electronic Engineering, Sichuan Normal University,  
Chengdu 610066, China;

<sup>3</sup> College of Physics and Electronic Engineering, Chongqing Normal University,  
Chongqing 400047, China;

<sup>4</sup> National Key Laboratory for Shock Wave and Detonation Physics Research,  
Institute of Fluid Physics, CAEP, Mianyang 621900, China

**Abstract:** Bismuth telluride (Bi<sub>2</sub>Te<sub>3</sub>) and its derivatives are often focused on as thermoelectric materials around room temperature. In this work, using the density functional theory (DFT) and Boltzmann transport theory, we theoretically predicted two new-type Bi<sub>2</sub>Te<sub>3</sub>-based two-dimensional materials Bi<sub>2</sub>SSe<sub>2</sub> and Bi<sub>2</sub>S<sub>2</sub>Se. The thermal, dynamic, and mechanical stabilities of Bi<sub>2</sub>SSe<sub>2</sub> and Bi<sub>2</sub>S<sub>2</sub>Se monolayers are confirmed based on ab-initio molecular dynamics (AIMD) simulations, phonon dispersion, and

\* Corresponding authors. E-mail: [cuiehu@cqnu.edu.cn](mailto:cuiehu@cqnu.edu.cn); [xrchen@scu.edu.cn](mailto:xrchen@scu.edu.cn)

elastic constants calculation. The phonon transport properties including lattice thermal conductivity, group velocity, Grüneisen parameter, converged scattering rate, and phonon lifetime contributed by different branches were systematically investigated. The electronic and thermoelectric properties including carrier mobility ( $\mu$ ), Seebeck coefficient ( $S$ ), electrical conductivity ( $\sigma$ ), power factor, and figure of merit ( $zT$ ) along the zigzag and armchair directions as a function of carrier concentration at different temperatures are also obtained.  $\text{Bi}_2\text{SSe}_2$  and  $\text{Bi}_2\text{S}_2\text{Se}$  monolayers have a moderate indirect band gap (0.92 and 1.08 eV at PBE level) and a low lattice thermal conductivity (4.35 and 5.37  $\text{W m}^{-1} \text{K}^{-1}$  at 300 K). The largest  $zT$  values of  $\text{Bi}_2\text{SSe}_2$  and  $\text{Bi}_2\text{S}_2\text{Se}$  monolayers are 0.50 and 0.28 at 300 K and 1.39 and 0.93 at 700 K for p-doping types, respectively. The  $\text{Bi}_2\text{SSe}_2$  and  $\text{Bi}_2\text{S}_2\text{Se}$  monolayers are predicted to possess high optical absorption peaks of  $8 \times 10^5 \text{ cm}^{-1}$  in the visible and near-UV light region, respectively. The results indicate that both  $\text{Bi}_2\text{SSe}_2$  and  $\text{Bi}_2\text{S}_2\text{Se}$  could be promising candidates in energy conversion, solar cells, and optoelectronic devices.

**Keywords:** Bismuth chalcogenides; First-principles; Two-dimensional materials; Electricity transport; Thermoelectric properties

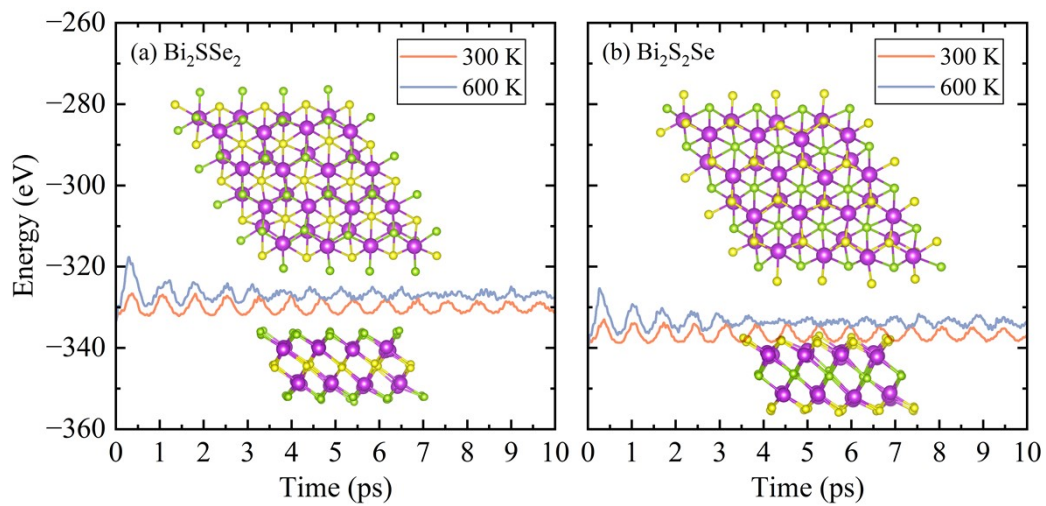

**Fig. S1** (Color online) The AIMD simulations of (a)  $\text{Bi}_2\text{SSe}_2$  and (b)  $\text{Bi}_2\text{S}_2\text{Se}$  monolayers at  $T = 300$  K (the blue lines) and  $T = 600$  K (the red lines). The inset shows the final structures of the monolayers from the top view (above the lines) and the side view (below the lines) after 10 ps AIMD simulations at  $T = 600$  K.

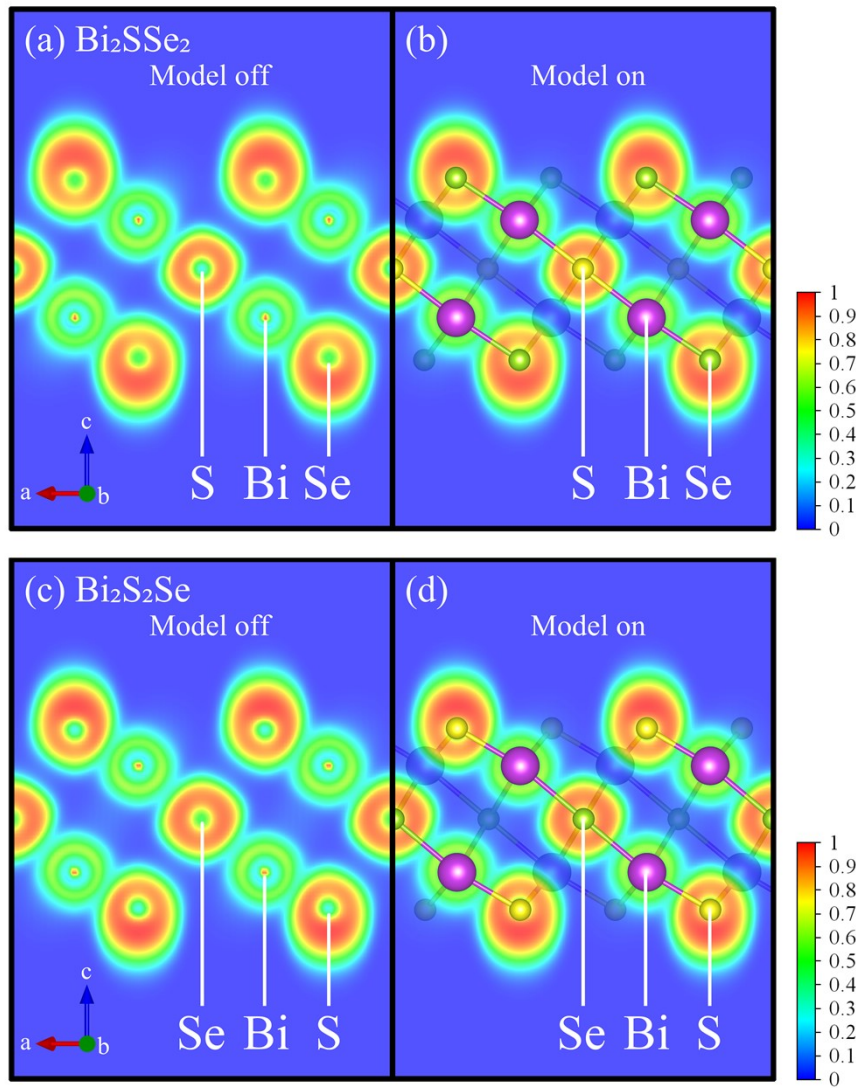

**Fig. S2** (Color online) The electron localization functions (ELF) of  $\text{Bi}_2\text{SSe}_2$  and  $\text{Bi}_2\text{S}_2\text{Se}$  monolayers from the side view.

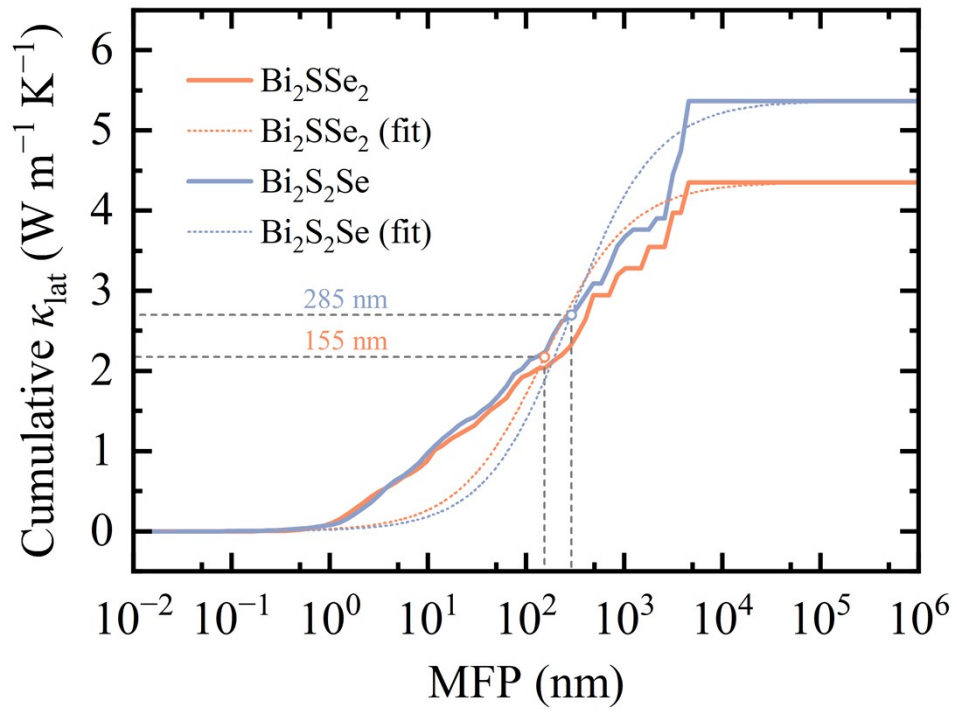

**Fig. S3** (Color online) The calculated and fitted cumulative lattice thermal conductivity of  $\text{Bi}_2\text{SSe}_2$  (red lines) and  $\text{Bi}_2\text{S}_2\text{Se}$  (blue lines) monolayers.

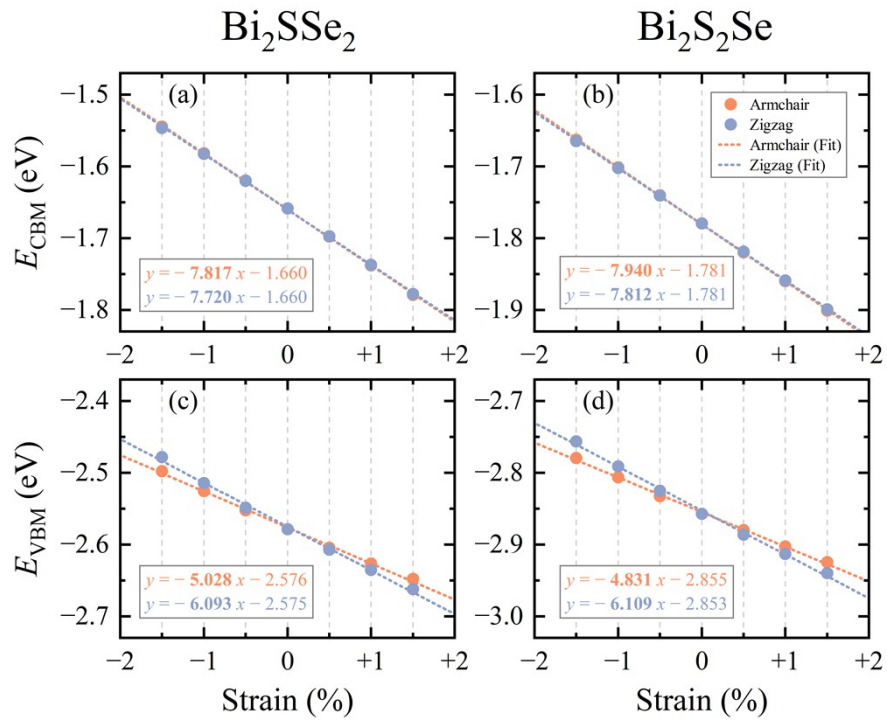

**Fig. S4** (Color online) The calculated and fitted deformation potential of  $\text{Bi}_2\text{SSe}_2$  and  $\text{Bi}_2\text{S}_2\text{Se}$  monolayers.

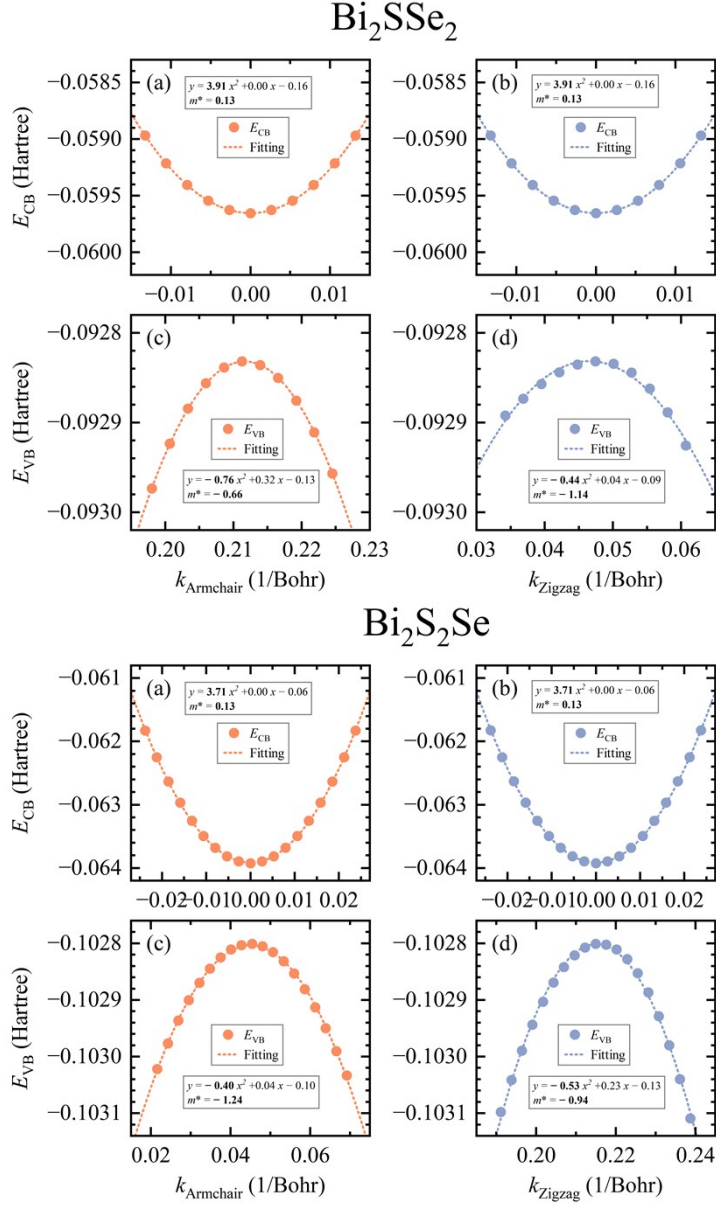

**Fig. S5** (Color online) The calculated and fitted effective masses of  $\text{Bi}_2\text{SSe}_2$  and  $\text{Bi}_2\text{S}_2\text{Se}$  monolayers.

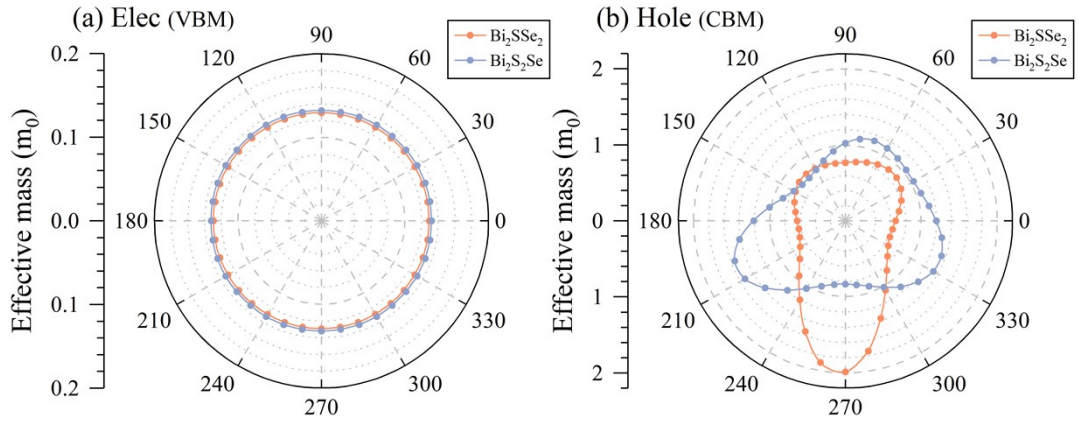

**Fig. S6** (Color online) The calculated angle-dependent effective mass of (a) electrons and (b) holes for  $\text{Bi}_2\text{SSe}_2$  (red lines) and  $\text{Bi}_2\text{S}_2\text{Se}$  (blue lines) monolayers in the square cells, where the 0 and 180 degrees are armchair directions, and 90 and 280 degrees are zigzag directions.



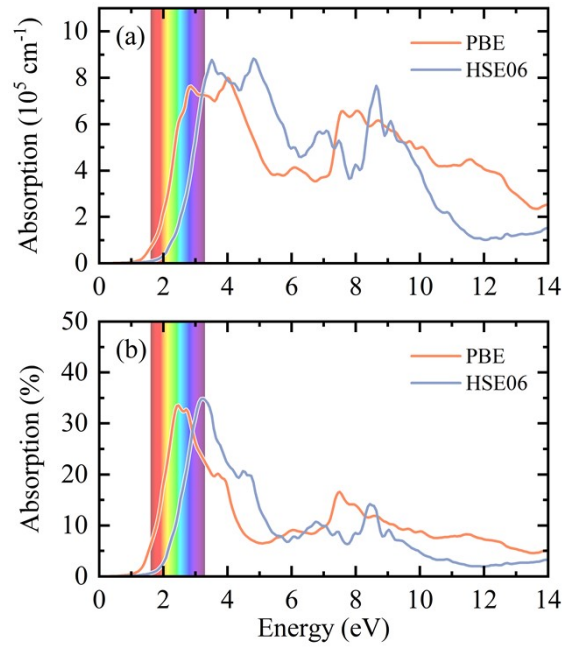

**Fig. S7** (Color online) The calculated (a) traditional absorption spectra and (b) two-dimensional absorption spectra of  $\text{Bi}_2\text{SSe}_3$  monolayers at PBE (red lines) and HSE06 (blue lines) levels, respectively. The simulated colors of the visible light are shown in the corresponding energy regions in the figure.
